1 Running header: *Myotis septentrionalis* roost selection

2 **Roost selection by male northern long-eared bats (*Myotis***  
3 ***septentrionalis*) in a managed fire-adapted forest**

4

5 Jesse M. Alston<sup>a,b\*</sup>, Ian M. Abernethy<sup>b</sup>, Douglas A. Keinath<sup>c</sup>, and Jacob R.

6 Goheen<sup>d</sup>

7

8 a. Program in Ecology, Department of Zoology and Physiology, University of Wyoming,

9 Laramie, WY 82071, USA

10 b. Wyoming Natural Diversity Database, University of Wyoming, Laramie, WY 82071, USA

11 c. Wyoming Ecological Services Field Office, U. S. Fish and Wildlife Service, Cheyenne, WY

12 82009, USA

13 d. Department of Zoology and Physiology, University of Wyoming, Laramie, WY 82071, USA

14

15 \*Corresponding author: [jalston@uwyo.edu](mailto:jalston@uwyo.edu)

16

17 **Abstract:** Wildlife conservation in multi-use landscapes requires identifying and conserving  
18 critical resources that may otherwise be destroyed or degraded by human activity. Summer day-  
19 roost sites are critical resources for bats, so conserving roost sites is thus a focus of many bat  
20 conservation plans. Studies quantifying day-roost characteristics typically focus on female bats  
21 due to their relative importance for reproduction, but large areas of species' ranges can be  
22 occupied predominantly by male bats due to sexual segregation. We used VHF telemetry to  
23 identify and characterize summer day-roost selection by male northern long-eared bats (*Myotis*  
24 *septentrionalis*) in a ponderosa pine (*Pinus ponderosa*) forest in South Dakota, USA. We tracked  
25 18 bats to 43 tree roosts and used an information theoretic approach to determine the relative  
26 importance of tree- and plot-level characteristics on roost site selection. Bats selected roost trees  
27 that were larger in diameter, more decayed, and under denser canopy than other trees available  
28 on the landscape. Much like studies of female northern long-eared bats have shown, protecting  
29 large-diameter snags within intact forest is important for the conservation of male northern long-  
30 eared bats. Unlike female-specific studies, however, many roosts in our study (39.5%) were  
31 located in short ( $\leq 3$  m) snags. Protecting short snags may be a low-risk, high-reward strategy for  
32 conservation of resources important to male northern long-eared bats. Other tree-roosting bat  
33 species in fire-prone forests are likely to benefit from forest management practices that promote  
34 these tree characteristics, particularly in high-elevation areas where populations largely consist of  
35 males.

36

37 **Key words:** Black Hills, Chiroptera, forest management, habitat use, prescribed fire, ponderosa  
38 pine (*Pinus ponderosa*), radiotelemetry

39

## 40 **1. Introduction**

41           Habitat degradation by humans is a leading cause of extinction and population declines of  
42 species globally (Dobson et al., 1997; Halpern et al., 2008; Hansen et al., 2013). Less than 15%  
43 of Earth’s land surface falls within a protected area, and less than half of that area is free from  
44 human development, agriculture, livestock grazing, light pollution, and transportation  
45 infrastructure (Jones et al., 2018). Even in relatively undisturbed areas, land uses other than  
46 conservation of nature—such as wildfire prevention, livestock grazing, recreation, and extraction  
47 of timber and other forest products—are the norm rather than the exception. Conservation  
48 measures targeting these multi-use landscapes are thus vital for conserving species (Kremen and  
49 Merenlender, 2018).

50           In multi-use landscapes, successful conservation often requires the identification of  
51 critical resources for species of conservation concern so that the supply of those critical resources  
52 can be maintained or increased. Day-roosts appear to be critical resources for many bats,  
53 providing shelter from predators and environmental stressors (Fenton et al., 1994; Solick and  
54 Barclay, 2006), communal sites for social interactions (Willis and Brigham, 2004), and secure  
55 places to raise young (Kunz, 1982). Bats spend most of their time in day-roosts, alone or in  
56 groups of up to millions of individuals, depending on sex, species, and reproductive status.  
57 Patterns of bat abundance and distribution are correlated with roost availability (Humphrey,  
58 1975), and declines in reproductive success have been documented when pregnant or lactating  
59 bats are experimentally excluded from preferred roosts (Brigham and Fenton, 1986). Because  
60 day-roosts are so important for bats, measures to conserve roosts feature prominently in bat  
61 conservation plans. Resource managers seeking to conserve bats while managing landscapes for  
62 multiple uses benefit from knowledge that promotes bat roost conservation.

63           We evaluated day-roost selection by male northern long-eared bats (*Myotis*  
64 *septentrionalis*) in a ponderosa pine forest in the Black Hills of South Dakota, USA. Our study  
65 population inhabits an intensively logged landscape at the western edge of this species' range.  
66 Northern long-eared bats inhabit much of the eastern United States and southern Canada  
67 (Caceres and Barclay, 2000), but are increasingly threatened by white nose syndrome and have  
68 been protected under the Endangered Species Act since 2015. Throughout their range, northern  
69 long-eared bats roost almost exclusively in tree cavities and under sloughing bark within intact  
70 forest (Lacki et al., 2009), and forage within forests or at forest edges (Henderson and Broders,  
71 2008; Owen et al., 2003; Patriquin and Barclay, 2003).

72           At our study site and other high elevation areas in the Black Hills, male bats are much  
73 more common than females (Choate and Anderson, 1997; Cryan et al., 2000). Sexual segregation  
74 driven by elevation or temperature is widespread among bats, and is believed to be driven by  
75 differences in energy requirements that allow males to inhabit areas that are colder or have less  
76 prey (Barclay, 1991; Ford et al., 2002; Senior et al., 2005). Male northern long-eared bats are  
77 therefore likely to occupy substantially different habitat than females, but range-wide  
78 conservation for the species is informed predominantly by studies focusing on female bats (J.  
79 Alston, unpublished data). Forest managers in male-dominated areas may therefore rely on  
80 incomplete information to conserve the majority of bats within their jurisdictions. Our study  
81 provides managers in such areas information to appropriately guide management in male-  
82 dominated areas and supplement the existing wealth of information on female habitat use.

83           To evaluate factors driving roost selection, we tracked adult male northern long-eared  
84 bats to day-roosts and quantified characteristics of both used and available roost trees using  
85 variables easily measured by forest and wildlife managers. We evaluated these data using an

86 information-theoretic approach to select the best models from a suite of candidate models. We  
87 hypothesized that in this intensively logged ecosystem, bats primarily select roost trees with  
88 characteristics that promote cavity formation (e.g., tree size and amount of decay), the number of  
89 nearby roosts (e.g., plot-level tree and snag density), and thermal characteristics suitable for  
90 behavioral thermoregulation (e.g., canopy cover and orientation in relation to sunlight).

91

## 92 **2. Methods**

### 93 2.1. Study Area

94 We conducted our study during the summers of 2017 and 2018 on Jewel Cave National  
95 Monument (43° 45' N, 103° 45' W) and surrounding areas of Black Hills National Forest, 16 km  
96 west of Custer, South Dakota, USA. In this area, mean monthly summer high temperatures range  
97 between 22 – 27° C and mean monthly summer precipitation ranges between 60 – 80 mm  
98 (Western Regional Climate Center, 2018). Open ponderosa pine (*Pinus ponderosa*) forests  
99 dominate our study site, with Rocky Mountain juniper (*Juniperus scopulorum*) and quaking  
100 aspen (*Populus tremuloides*) occurring locally. In our local study area, forests form a  
101 heterogenous mosaic with northern mixed-grass prairie where a large stand-replacing fire  
102 occurred in 2000. A large cave system and several smaller caves lie underground at our study  
103 site, and there is substantial topographic relief on the landscape in the form of intersecting  
104 canyon systems and rock outcrops.

105 Forests in this landscape are intensively managed. Black Hills National Forest typically  
106 uses even-aged management techniques other than clear-cutting (e.g., two-step shelterwood  
107 harvest). Stand harvest rotations are 120 years on average, but selective cutting occurs at 10- to  
108 20-year intervals to harvest mature trees and thin the understory. Aside from large severe

109 wildfires, the forest self-regenerates and does not require planting. Forest management on private  
110 lands generally also follow this formula but thinning intervals vary (B. Phillips, personal  
111 communication). Forests on Jewel Cave National Monument are managed for resource  
112 preservation, primarily using prescribed fire.

113

## 114 2.2. Capture and VHF Telemetry

115 We used mist nets to capture bats over permanent and semi-permanent water sources  
116 (e.g., springs, stock tanks, and stock ponds). In summer (Jun–Aug) 2017 and 2018, we netted 20  
117 and 49 nights at 9 and 15 water sources, respectively. We opened mist nets at civil sunset and  
118 closed them after five hours and during inclement weather. We affixed VHF transmitters (LB-2X  
119 model .28 g – Holohil Systems Ltd., Carp, ON, Canada; .25 g model – Blackburn, Nacogdoches,  
120 TX, USA) between the scapulae of adult male northern long-eared bats with latex surgical  
121 adhesive (Osto-Bond, Montreal Ostomy, Montreal, QC, Canada). In our study area and others in  
122 the region (Cryan et al. 2000), sex ratios are overwhelmingly male. Because patterns of roost  
123 selection can differ between male and female bats (Boland et al., 2009; Elmore et al., 2004; Hein  
124 et al., 2008; Perry and Thill, 2007), we targeted males specifically. Additionally, the roosting  
125 habits of male bats are less studied than those of females—only 2 of the 14 peer-reviewed studies  
126 on roost selection of northern long-eared bats provide data on males, and 11 out of 111 peer-  
127 reviewed studies on roost selection of cavity-roosting bats in general provide data on males (J.  
128 Alston, unpublished data). All transmitters weighed <5% of the mass of the bat (Aldridge and  
129 Brigham, 1988). We tracked bats to roosts each day transmitters were active. All protocols were  
130 approved by the University of Wyoming and National Park Service Animal Care and Use

131 Committees and met guidelines approved by the American Society of Mammalogists (Sikes,  
132 2016).

133

### 134 2.3. Roost Characterization

135 To characterize roosts, we collected data for each roost and randomly sampled available  
136 roost trees in our study area. We identified available roost trees by generating a sample of 200  
137 random points within 2.53 km (the farthest distance we located a bat roosting from its capture  
138 site during our study) of sites where we captured northern long-eared bats and selecting the  
139 nearest available roost tree at a random bearing from each point. We defined available roost trees  
140 as live trees >20 cm in diameter or any dead tree with a visible defect (e.g. sloughing bark or  
141 cavities) sufficiently large for a bat to roost within. For each tree and plot, we measured  
142 characteristics that may influence roost suitability (Table 1). We measured vegetation  
143 characteristics at two spatial scales: 1) individual trees, and 2) a 706.86 m<sup>2</sup> (15 m radius) plot  
144 around the tree. We also measured topographic variables at the plot scale.

145

### 146 2.4. Statistical Analysis

147 To quantify differences between roost trees used by northern long-eared bats and the 200  
148 randomly sampled available roost trees, we used the R statistical software environment (R Core  
149 Team, 2018) to build binomial-family generalized linear models in a use-availability sampling  
150 design (Manly et al., 2007). We employed an information theoretic approach using Akaike's  
151 Information Criterion adjusted for small sample sizes (AIC<sub>c</sub>) to compare competing models  
152 (Burnham and Anderson, 2002) using the 'MuMIn' package (Barton, 2018). We calculated AIC<sub>c</sub>  
153 values and model weights ( $w_i$ ) for all possible combinations of a maximum of 8 predictors (one

154 variable for each 5 observations) in our set of candidate models to prevent bias and unreliable  
155 confidence interval coverage (Vittinghoff and McCulloch, 2007). Predictors with variance  
156 inflation factors  $> 10$  were removed from consideration in our global model to reduce problems  
157 associated with multicollinearity (Kutner, 2005). We averaged model coefficients for all models  
158 with cumulative  $w_i > .95$  (Burnham and Anderson, 2002) using the full-averaging method.  
159 Finally, we validated our averaged model using area under the receiver operating characteristic  
160 curve (AUC; Manel et al., 2001; Swets, 1988).

161

### 162 **3. Results**

163 We located 44 roosts used on 59 days by 18 bats during our study. Aside from one roost  
164 in a rock crevice, bats roosted exclusively in ponderosa pines, either in cavities or under loose  
165 bark. Thirty-six out of 43 tree roosts (83.7%) occurred in dead trees (hereafter termed “snags”).  
166 We found  $2.4 \pm 0.3$  (range: 1-5) roost trees per bat. Bats typically roosted in the same patch of  
167 contiguous forest for the active life of the transmitter. Bats roosted  $790 \pm 90$  m (range: 55 –  
168 2,530 m) from the sites at which they were captured.

169 Our global model distinguishing used roost trees from available roost trees incorporated  
170 DBH, tree height, decay class (Maser et al., 1979), slope, aspect (split into two components—  
171 eastness and southness), percent bark remaining, plot tree density, plot snag density, plot canopy  
172 cover, and interaction terms between slope and eastness and slope and southness. The global  
173 model provided an adequate fit to the data (le Cessie-van Houwelingen-Copas-Hosmer global  
174 goodness of fit test;  $z = 0.805$ ,  $p = 0.421$ ). Our averaged model (incorporating 104 models in our  
175 confidence set; Table A.1) indicated that DBH, decay class, and canopy cover were important  
176 variables (Table 2). Significant ( $p < .05$ ) averaged model coefficients, confidence intervals, and



177 scaled and unscaled odds ratios are reported in Table 3. Mean differences between used and  
178 available roost trees among our variables of interest are reported in Table 4. Predictive  
179 performance of the averaged model was very high (AUC = 0.924).

180 Three variables (DBH, decay class, and canopy cover) were positively related to roost  
181 selection (Fig. 1; Table 2). For each 5 cm increase in DBH, odds of selection increased by 61%  
182 (CI: 21-113%). For each 1 unit increase in decay class, odds of selection increased by 111% (CI:  
183 47-203%). For each additional 10% increase in canopy cover, the odds of selection increased by  
184 126% (CI: 55-230%).

185

#### 186 **4. Discussion**

187 Northern long-eared bats primarily selected roosts in trees with characteristics that  
188 promote cavity formation. At the level of individual trees, northern long-eared bats selected for  
189 large diameter trees with substantial decay. This corroborates previous work on northern long-  
190 eared bats (Jung et al., 2004; Rojas et al., 2017) and is intuitive because large trees with more  
191 decay have more roost structures (i.e., cavities and loose bark) for bats to use (Reynolds et al.,  
192 1985). This is particularly true of ponderosa pines, which can produce large amounts of resin to  
193 defend against physical injury (Kane and Kolb, 2010; Lewinsohn et al., 1991) and therefore tend  
194 to develop cavities only when they are scarred or dead. In intensively logged landscapes like the  
195 Black Hills, cavities are found overwhelmingly in snags because most trees are harvested before  
196 they reach ages at which cavities typically form.

197 Conservation actions targeting northern long-eared bats should include preservation of  
198 large snags whenever possible. Our study demonstrated that northern long-eared bats select  
199 large-diameter snags (>37 cm), and large diameter snags also tend to remain standing longer than

200 thinner snags (Bull, 1983; Chambers and Mast, 2014). These snags need not be tall—short ( $\leq 3$   
201 m) snags are important resources for male northern long-eared bats as well. Seventeen of 43  
202 (39.5%) roosts that we located occurred in broken-off snags  $\leq 3$  m in height. These are important  
203 resources and are likely more vulnerable to loss during forest management activities (particularly  
204 prescribed fire) than other potential roost trees. Snags are often intentionally removed during  
205 forest management activities because of hazards posed to forest management personnel (e.g.,  
206 loggers and firefighters) and the general public. However, these short snags pose less danger to  
207 forest management personnel and the public than taller snags, and their preservation is therefore  
208 a realistic and actionable step toward bat conservation.

209         Of the variables we considered that may influence thermal characteristics of roosts, only  
210 canopy cover influenced roost selection significantly. Trees were more likely to be used as roosts  
211 as surrounding canopy cover increased, and use was greater than availability at all canopy cover  
212 levels  $>19\%$ . Although many snags were available at our study site in open areas burned by a  
213 severe wildfire in 2000, northern long-eared bats rarely use those snags, instead selecting snags  
214 in the interior of forest stands with live canopy. Forty out of 43 (93.0%) roosts were within or  
215 immediately bordering intact forest stands with live canopy, and all roosts were within 50 m of  
216 intact forest stands. Bats may prefer these areas because canopy cover creates cooler  
217 environments, but they may also simply prefer to be immediately near forested areas where they  
218 forage (Henderson and Broders, 2008; Owen et al., 2003; Patriquin and Barclay, 2003). Either  
219 way, stand-replacing fire likely poses risks to local populations of northern long-eared bats at the  
220 western edge of its range, where severe wildfire is increasingly prevalent due to climate change  
221 (Westerling et al., 2006). Clearcutting also poses risks to local populations of northern long-

222 eared bats in these areas, even if snags are retained. Selective logging that leaves some level of  
223 canopy cover remaining would ensure that snag retention is effective for bat roost conservation.

224 Dynamics of regional disturbance may be important when evaluating local-scale factors  
225 that influence roost selection (O'Keefe and Loeb, 2017). The ponderosa-dominated landscape  
226 where we conducted our research is substantially different than other landscapes (i.e., deciduous  
227 and mixed forests in eastern North America) where roost selection by northern long-eared bats  
228 has been studied. Although many of the factors driving roost selection appear to be similar  
229 among areas, the processes that create roosts may be fundamentally different in different areas.  
230 Snags in ponderosa pine forests are often generated in large pulses by severe wildfire and  
231 mountain pine beetles (*Dendroctonus ponderosae*), but the long-term ramifications of these  
232 resource pulses for bats are not well understood. Severe wildfire appears to create snags that are  
233 largely unused by bats. Mountain pine beetle outbreaks may do the same if beetle-induced  
234 mortality reduces or eliminates canopy cover over large areas, or if outbreaks lead to more severe  
235 fires. Northern long-eared bats may instead depend on snag-generating processes that operate at  
236 more local scales and over longer intervals to create suitable roosts.

237 Roost selection by bats varies by sex, age class, and reproductive condition (Elmore et  
238 al., 2004; Hein et al., 2008). Studies on roost selection generally focus on females because they  
239 tend to drive reproduction, which is required to sustain populations. However, targeting roost  
240 conservation toward females exclusively may neglect resources that are important for males.  
241 Because sex ratios can be heavily biased in some areas (Cryan et al., 2000), ignoring the needs of  
242 males could leave resources that are important for most individuals inhabiting these areas  
243 unprotected. On the other hand, designing roost conservation measures on studies of males alone  
244 will leave resources that are important for females unprotected. For example, short ( $\leq 3$  m) snags

245 are important resources for males, but they may not be for females, which aggregate in maternity  
246 colonies that require larger cavities than largely solitary males (Perry and Thill, 2007). Resource  
247 managers seeking to conserve bats should take these sex differences into account when  
248 developing conservation plans and designing studies to inform those plans. In high elevation  
249 areas, males may be more important than females for sustaining local populations because there  
250 are few females in those areas.

251

## 252 **5. Conclusions**

253 Forest managers require actionable knowledge to guide conservation, and our results  
254 indicate that conserving large-diameter snags within intact forest stands is one such action that  
255 can be taken to conserve bats in wildfire-prone coniferous forests. Short ( $\leq 3$  m) snags in  
256 particular represent a low-risk, high-reward resource to target for preservation in male-biased,  
257 high elevation populations. For federally threatened northern long-eared bats, conserving these  
258 snags at the western edge of their range may prevent range contraction and local extinction.  
259 Similar patterns are likely to hold true for other cavity-roosting bat species in wildfire-prone  
260 coniferous forests, like those found throughout western North America. Although bats face  
261 danger from many threats unrelated to roosts (e.g., white nose syndrome, wind energy  
262 development, etc.), roost conservation remains an important tool for bat conservation in the face  
263 of such threats.

264

## 265 **Acknowledgements**

266 Many thanks to L. Boodoo, C. McFarland, E. Greene, B. Tabor, and B. Phillips for help with  
267 fieldwork; J. Rick for helpful comments on pre-submission versions of this manuscript; R.

268 Anderson-Sprecher for helpful comments concerning statistical analyses; and P. Ortegon, D.  
269 Licht, M. Wiles, D. Austin, B. Phillips, and E. Thomas for their logistical support of this project.  
270 Research funding was provided by the National Park Service, the Department of Zoology and  
271 Physiology at the University of Wyoming, the Berry Ecology Center, the American Society of  
272 Mammalogists, Prairie Biotic Research, Inc., and the Wyoming Chapter of The Wildlife Society.  
273 The findings and conclusions in this article are those of the authors and do not necessarily  
274 represent the views of the U.S. Fish and Wildlife Service or the National Park Service.

275

## 276 **Appendix A: Supplementary Data**

277 **Table A.1.** Candidate models,  $\Delta$ AIC values, and model weights ( $w_i$ ) used to determine model-  
278 averaged coefficients.

279

## 280 **Data Availability**

281 \*Data and R code used in analysis are available in the supplementary material and will be  
282 archived on the lead author's personal website if this manuscript is accepted for publication.

283

## 284 **Literature Cited**

285 Aldridge, H.D.J.N., Brigham, R.M., 1988. Load carrying and maneuverability in an  
286 insectivorous bat: a test of the 5% "rule" of radio-telemetry. *Journal of Mammalogy* 69,  
287 379–382. <https://doi.org/10.2307/1381393>

288 Barclay, R.M.R., 1991. Population structure of temperate zone insectivorous bats in relation to  
289 foraging behaviour and energy demand. *Journal of Animal Ecology* 60, 165–178.

290 <https://doi.org/10.2307/5452>

- 291 Barton, K., 2018. MuMIn: multi-model inference.
- 292 Boland, J.L., Hayes, J.P., Smith, W.P., Huso, M.M., 2009. Selection of day-roosts by Keen's  
293 myotis (*Myotis keenii*) at multiple spatial scales. *Journal of Mammalogy* 90, 222–234.  
294 <https://doi.org/10.1644/07-MAMM-A-369.1>
- 295 Brigham, R.M., Fenton, M.B., 1986. The influence of roost closure on the roosting and foraging  
296 behaviour of *Eptesicus fuscus* (Chiroptera: Vespertilionidae). *Can. J. Zool.* 64, 1128–  
297 1133. <https://doi.org/10.1139/z86-169>
- 298 Bull, E.L., 1983. Longevity of snags and their use by woodpeckers (General Technical Report  
299 No. GTR-RM-99), Proceedings of the symposium: snag habitat management. Rocky  
300 Mountain Research Station, Forest Service, US Department of Agriculture, Fort Collins,  
301 CO.
- 302 Burnham, K.P., Anderson, D.R., 2002. Model selection and multimodel inference: a practical  
303 information-theoretic approach, 2nd ed. ed. Springer, New York.
- 304 Caceres, M.C., Barclay, R.M.R., 2000. *Myotis septentrionalis*. *Mammalian Species* 1–4.  
305 [https://doi.org/10.1644/1545-1410\(2000\)634<0001:MS>2.0.CO;2](https://doi.org/10.1644/1545-1410(2000)634<0001:MS>2.0.CO;2)
- 306 Chambers, C.L., Mast, J.N., 2014. Snag dynamics and cavity excavation after bark beetle  
307 outbreaks in southwestern ponderosa pine forests. *Forest Science* 60, 713–723.  
308 <https://doi.org/10.5849/forsci.13-018>
- 309 Choate, J.R., Anderson, J.M., 1997. The bats of Jewel Cave National Monument, South Dakota.  
310 *The Prairie Naturalist* 29, 38–47.
- 311 Cryan, P.M., Bogan, M.A., Altenbach, J.S., 2000. Effect of elevation on distribution of female  
312 bats in the Black Hills, South Dakota. *Journal of Mammalogy* 81, 719–725.  
313 [https://doi.org/10.1644/1545-1542\(2000\)081<0719:EOEODO>2.3.CO;2](https://doi.org/10.1644/1545-1542(2000)081<0719:EOEODO>2.3.CO;2)

- 314 Dobson, A.P., Bradshaw, A.D., Baker, A.J.M., 1997. Hopes for the future: restoration ecology  
315 and conservation biology. *Science* 277, 515–522.  
316 <https://doi.org/10.1126/science.277.5325.515>
- 317 Elmore, L.W., Miller, D.A., Vilella, F.J., 2004. Selection of diurnal roosts by red bats (*Lasiurus*  
318 *borealis*) in an intensively managed pine forest in Mississippi. *Forest Ecology and*  
319 *Management* 199, 11–20. <https://doi.org/10.1016/j.foreco.2004.03.045>
- 320 Fenton, M.B., Rautenbach, I.L., Smith, S.E., Swanepoel, C.M., Grosell, J., van Jaarsveld, J.,  
321 1994. Raptors and bats: threats and opportunities. *Animal Behaviour* 48, 9–18.  
322 <https://doi.org/10.1006/anbe.1994.1207>
- 323 Ford, W.M., Menzel, M.A., Menzel, J.M., Welch, D.J., 2002. Influence of summer temperature  
324 on sex ratios in eastern red bats (*Lasiurus borealis*). *The American Midland Naturalist*  
325 147, 179–184.
- 326 Halpern, B.S., Walbridge, S., Selkoe, K.A., Kappel, C.V., Micheli, F., D’Agrosa, C., Bruno, J.F.,  
327 Casey, K.S., Ebert, C., Fox, H.E., Fujita, R., Heinemann, D., Lenihan, H.S., Madin,  
328 E.M.P., Perry, M.T., Selig, E.R., Spalding, M., Steneck, R., Watson, R., 2008. A global  
329 map of human impact on marine ecosystems. *Science* 319, 948–952.  
330 <https://doi.org/10.1126/science.1149345>
- 331 Hansen, M.C., Potapov, P.V., Moore, R., Hancher, M., Turubanova, S.A., Tyukavina, A., Thau,  
332 D., Stehman, S.V., Goetz, S.J., Loveland, T.R., Kommareddy, A., Egorov, A., Chini, L.,  
333 Justice, C.O., Townshend, J.R.G., 2013. High-resolution global maps of 21st-century  
334 forest cover change. *Science* 342, 850–853. <https://doi.org/10.1126/science.1244693>

- 335 Hein, C.D., Castleberry, S.B., Miller, K.V., 2008. Sex-specific summer roost-site selection by  
336 Seminole bats in response to landscape-level forest management. *Journal of Mammalogy*  
337 89, 964–972. <https://doi.org/10.1644/07-MAMM-A-335.1>
- 338 Henderson, L.E., Broders, H.G., 2008. Movements and resource selection of the northern long-  
339 eared myotis (*Myotis septentrionalis*) in a forest—agriculture landscape. *Journal of*  
340 *Mammalogy* 89, 952–963. <https://doi.org/10.1644/07-MAMM-A-214.1>
- 341 Humphrey, S.R., 1975. Nursery roosts and community diversity of Nearctic bats. *Journal of*  
342 *Mammalogy* 56, 321–346. <https://doi.org/10.2307/1379364>
- 343 Jones, K.R., Venter, O., Fuller, R.A., Allan, J.R., Maxwell, S.L., Negret, P.J., Watson, J.E.M.,  
344 2018. One-third of global protected land is under intense human pressure. *Science* 360,  
345 788–791. <https://doi.org/10.1126/science.aap9565>
- 346 Jung, T.S., Thompson, I.D., Titman, R.D., 2004. Roost site selection by forest-dwelling male  
347 *Myotis* in central Ontario, Canada. *Forest Ecology and Management* 202, 325–335.  
348 <https://doi.org/10.1016/j.foreco.2004.07.043>
- 349 Kane, J.M., Kolb, T.E., 2010. Importance of resin ducts in reducing ponderosa pine mortality  
350 from bark beetle attack. *Oecologia* 164, 601–609. [https://doi.org/10.1007/s00442-010-](https://doi.org/10.1007/s00442-010-1683-4)  
351 1683-4
- 352 Kremen, C., Merenlender, A.M., 2018. Landscapes that work for biodiversity and people.  
353 *Science* 362, eaau6020. <https://doi.org/10.1126/science.aau6020>
- 354 Kunz, T.H., 1982. Roosting ecology of bats, in: Kunz, T.H. (Ed.), *Ecology of Bats*. Springer US,  
355 Boston, MA, pp. 1–55. [https://doi.org/10.1007/978-1-4613-3421-7\\_1](https://doi.org/10.1007/978-1-4613-3421-7_1)
- 356 Kutner, M.H. (Ed.), 2005. *Applied linear statistical models*, 5th ed. ed, The McGraw-Hill/Irwin  
357 series operations and decision sciences. McGraw-Hill Irwin, Boston.



- 358 Lacki, M.J., Cox, D.R., Dickinson, M.B., 2009. Meta-analysis of summer roosting characteristics  
359 of two species of *Myotis* bats. *The American Midland Naturalist* 162, 318–326.
- 360 Lewinsohn, E., Gijzen, M., Croteau, R., 1991. Defense mechanisms of conifers: differences in  
361 constitutive and wound-induced monoterpene biosynthesis among species. *Plant*  
362 *Physiology* 96, 44–49. <https://doi.org/10.1104/pp.96.1.44>
- 363 Manel, S., Williams, H.C., Ormerod, S.J., 2001. Evaluating presence–absence models in  
364 ecology: the need to account for prevalence. *Journal of Applied Ecology* 38, 921–931.  
365 <https://doi.org/10.1046/j.1365-2664.2001.00647.x>
- 366 Manly, B.F.L., McDonald, L., Thomas, D.L., McDonald, T.L., Erickson, W.P., 2007. Resource  
367 selection by animals: statistical design and analysis for field studies. Springer Science &  
368 Business Media.
- 369 Maser, C., Anderson, R.G., Kromack, Jr., K., 1979. Dead and down woody material, in: *Wildlife*  
370 *Habitats in Managed Forests: The Blue Mountains of Oregon and Washington*.  
371 *Agricultural Handbook 553*. U.S. Department of Agriculture, Forest Service,  
372 Washington, D.C., pp. 78–95.
- 373 O’Keefe, J.M., Loeb, S.C., 2017. Indiana bats roost in ephemeral, fire-dependent pine snags in  
374 the southern Appalachian Mountains, USA. *Forest Ecology and Management* 391, 264–  
375 274. <https://doi.org/10.1016/j.foreco.2017.01.036>
- 376 Owen, S.F., Menzel, M.A., Ford, W.M., Chapman, B.R., Miller, K.V., Edwards, J.W., Wood,  
377 P.B., 2003. Home-range size and habitat used by the northern myotis (*Myotis*  
378 *septentrionalis*). *The American Midland Naturalist* 150, 352–359.  
379 [https://doi.org/10.1674/0003-0031\(2003\)150\[0352:HSAHUB\]2.0.CO;2](https://doi.org/10.1674/0003-0031(2003)150[0352:HSAHUB]2.0.CO;2)

- 380 Patriquin, K.J., Barclay, R.M.R., 2003. Foraging by bats in cleared, thinned and unharvested  
381 boreal forest. *Journal of Applied Ecology* 40, 646–657. <https://doi.org/10.1046/j.1365->  
382 2664.2003.00831.x
- 383 Perry, R.W., Thill, R.E., 2007. Roost selection by male and female northern long-eared bats in a  
384 pine-dominated landscape. *Forest Ecology and Management* 247, 220–226.  
385 <https://doi.org/10.1016/j.foreco.2007.04.041>
- 386 R Core Team, 2018. R: A language and environment for statistical computing. R Foundation for  
387 Statistical Computing, Vienna, Austria.
- 388 Reynolds, R.T., Linkhart, B.D., Jeanson, J., 1985. Characteristics of snags and trees containing  
389 cavities in a Colorado conifer forest (USDA Forest Service Research Note No. RM-455).  
390 Rocky Mountain Forest and Range Experiment Station, Fort Collins, CO.
- 391 Rojas, V.G., O’Keefe, J.M., Loeb, S.C., 2017. Baseline capture rates and roosting habits of  
392 *Myotis septentrionalis* (northern long-eared bat) prior to white-nose syndrome detection  
393 in the Southern Appalachians. *Southeastern Naturalist* 16, 140–148.  
394 <https://doi.org/10.1656/058.016.0202>
- 395 Senior, P., Butlin, R.K., Altringham, J.D., 2005. Sex and segregation in temperate bats. *Proc Biol*  
396 *Sci B* 272, 2467–2473. <https://doi.org/10.1098/rspb.2005.3237>
- 397 Sikes, R.S., 2016. 2016 guidelines of the American Society of Mammalogists for the use of wild  
398 mammals in research and education. *Journal of Mammalogy* 97, 663–688.  
399 <https://doi.org/10.1093/jmammal/gyw078>
- 400 Solick, D.I., Barclay, R.M.R., 2006. Thermoregulation and roosting behaviour of reproductive  
401 and nonreproductive female western long-eared bats (*Myotis evotis*) in the Rocky

- 402 Mountains of Alberta. Canadian Journal of Zoology 84, 589–599.  
403 <https://doi.org/10.1139/z06-028>
- 404 Swets, J.A., 1988. Measuring the accuracy of diagnostic systems. Science 240, 1285–1293.  
405 <https://doi.org/10.1126/science.3287615>
- 406 Vittinghoff, E., McCulloch, C.E., 2007. Relaxing the rule of ten events per variable in logistic  
407 and Cox regression. Am J Epidemiol 165, 710–718. <https://doi.org/10.1093/aje/kwk052>
- 408 Westerling, A.L., Hidalgo, H.G., Cayan, D.R., Swetnam, T.W., 2006. Warming and earlier  
409 spring increase western U.S. forest wildfire activity. Science 313, 940–943.  
410 <https://doi.org/10.1126/science.1128834>
- 411 Western Regional Climate Center, 2018. NCDC 1981-2010 monthly normals: Custer, SD. URL  
412 <https://wrcc.dri.edu/cgi-bin/cliMAIN.pl?sd2087>
- 413 Willis, C.K.R., Brigham, R.M., 2004. Roost switching, roost sharing and social cohesion: forest-  
414 dwelling big brown bats, *Eptesicus fuscus*, conform to the fission–fusion model. Animal  
415 Behaviour 68, 495–505. <https://doi.org/10.1016/j.anbehav.2003.08.028>
- 416

417 **Figure Legends**

418 **Fig. 1.** Unscaled odds ratios associated with each variable in the averaged roost selection model.

419 Error bars represent 95% confidence intervals.

420

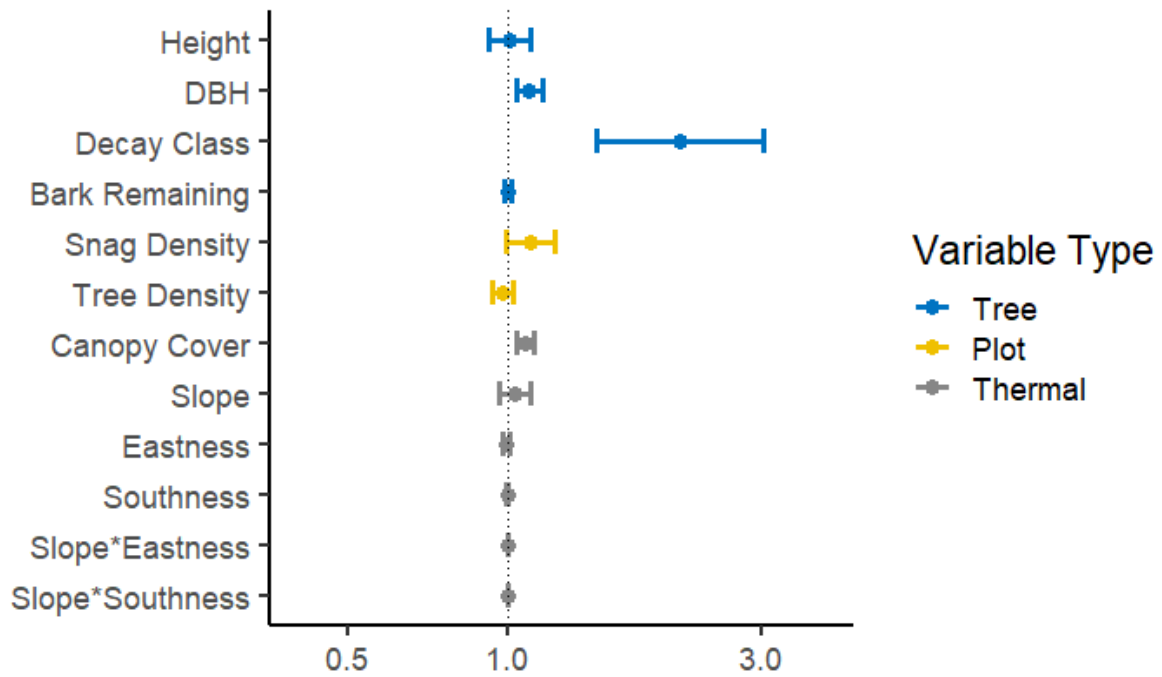

421

422 **Table 1.** Variables measured at used and available summer day-roosts of male northern long-  
423 eared bats (*Myotis septentrionalis*) in the Black Hills of South Dakota, 2017–2018.

| Variable        | Definition                                                                                  |
|-----------------|---------------------------------------------------------------------------------------------|
| DBH             | Tree diameter at breast height (cm)                                                         |
| Height          | Tree height (m)                                                                             |
| Snag            | Tree status (live/dead)                                                                     |
| Decay Class     | Stage of tree decay on ordinal scale                                                        |
| Bark Remaining  | Bark remaining on tree stem (%)                                                             |
| Canopy Cover    | Average of 4 canopy cover measurements (N/E/S/W) taken 5 m from tree (%)                    |
| Slope           | Slope of 706.9 m <sup>2</sup> (15 m radius) plot centered at tree (%)                       |
| Tree Density    | Number of trees in 706.9 m <sup>2</sup> plot centered at tree                               |
| Snag Density    | Number of snags in 706.9 m <sup>2</sup> plot centered at tree                               |
| Eastness        | Difference between aspect of 706.9 m <sup>2</sup> plot centered at tree and 90 degrees (°)  |
| Southness       | Difference between aspect of 706.9 m <sup>2</sup> plot centered at tree and 180 degrees (°) |
| Slope*Eastness  | Interaction term between slope and eastness                                                 |
| Slope*Southness | Interaction term between slope and southness                                                |

424

425 **Table 2.** Coefficient estimates in the averaged model and 95% confidence intervals. Bold variables denote significance at  $\alpha = .05$ .

| Variable            | Estimate      | LCL (95%)     | UCL (95%)     |
|---------------------|---------------|---------------|---------------|
| Height              | 0.0133        | -0.0767       | 0.1033        |
| <b>DBH</b>          | <b>0.0948</b> | <b>0.0382</b> | <b>0.1514</b> |
| <b>Decay Class</b>  | <b>0.7465</b> | <b>0.3835</b> | <b>1.1094</b> |
| Bark Remaining      | 0.0033        | -0.0113       | 0.0180        |
| Snag Density        | 0.1010        | -0.0039       | 0.2059        |
| Tree Density        | -0.0182       | -0.0653       | 0.0289        |
| <b>Canopy Cover</b> | <b>0.0816</b> | <b>0.0438</b> | <b>0.1195</b> |
| Slope               | 0.0323        | -0.0354       | 0.0999        |
| Eastness            | -0.0069       | -0.0207       | 0.0068        |
| Southness           | 0.0004        | -0.0041       | 0.0050        |
| Slope*Eastness      | 0.0001        | -0.0004       | 0.0005        |
| Slope*Southness     | 0.0000        | -0.0002       | 0.0002        |

426

427

428 **Table 3.** Averaged model coefficients, confidence intervals, and scaled and unscaled odds ratios for significant variables.

| Variable     | Coefficient | Unscaled OR | Scaled OR | Units  | Scaled OR LCL (95%) | Scaled OR UCL (95%) |
|--------------|-------------|-------------|-----------|--------|---------------------|---------------------|
| DBH          | 0.0948      | 1.0995      | 1.6065    | 5 cm   | 1.2105              | 2.1321              |
| Decay Class  | 0.7447      | 2.1095      | 2.1095    | 1 unit | 1.4674              | 3.0327              |
| Canopy Cover | 0.0814      | 1.0850      | 2.2619    | 10%    | 1.5491              | 3.3025              |

429

430 **Table 4.** Means and standard errors for variables of interest among used and available trees.

431 Bold font denotes statistically significant variables in the final averaged model.

| Variable                | <u>Roost</u> |             | <u>Available</u> |             |
|-------------------------|--------------|-------------|------------------|-------------|
|                         | Mean         | SE          | Mean             | SE          |
| Height (m)              | 8.53         | 1.11        | 9.01             | 0.43        |
| <b>DBH (cm)</b>         | <b>35.69</b> | <b>1.57</b> | <b>30.33</b>     | <b>0.69</b> |
| <b>Decay Class</b>      | <b>4.95</b>  | <b>0.33</b> | <b>3.72</b>      | <b>0.18</b> |
| Bark Remaining (%)      | 74.19        | 4.22        | 69.73            | 2.49        |
| Snag Density            | 4.74         | 1.03        | 2.12             | 0.23        |
| Tree Density            | 19.84        | 2.15        | 10.76            | 1.12        |
| <b>Canopy Cover (%)</b> | <b>36.83</b> | <b>3.02</b> | <b>14.96</b>     | <b>1.39</b> |
| Slope (%)               | 16.87        | 1.62        | 11.66            | 0.64        |
| Eastness (°)            | 76.36        | 8.21        | 93.35            | 3.81        |
| Southness (°)           | 109.48       | 11.14       | 96.58            | 5.48        |

432
